# Supplementary material
Source: HighWire-hosted journal article supplement (doi:10.1101/rna.080635.125)
Supplement: Supplemental_Figure_Legends.docx [file Supplemental_Figure_Legends.docx]

**Supplemental Figure 1: G3BP1/2 genes promote cell-cycle exit. (A)** Violin plots displaying the mean nuclear intensity of p-Rb in untreated wildtype, G3BP1/2 dKO, and GFP-G3BP1 + G3BP1/2 dKO U-2 OS cells. Data from three independent biological replicates are presented. **(B)** Cumulative frequency distribution illustrating the fraction of cells categorized based on binned p-Rb mean intensity levels in untreated wildtype, G3BP1/2 dKO, and GFP-G3BP1 + G3BP1/2 dKO U-2 OS cells. The data used for generating images and figures in Figure 2A-B, and Supplemental Figures 1A-B are derived from the same dataset. **(C)** Scatterplot of stress granule numbers per cell after cells were treated for 1-hour with 100 µM arsenite for wildtype, G3BP1/2 dKO and GFP-G3BP1 + G3BP1/2 dKO U-2 OS cells. **(D)** Violin plots of p-Rb mean nuclear intensity for 6-hour 100 µM arsenite-treated wildtype, G3BP1/2 dKO and GFP-G3BP1 + G3BP1/2 dKO U-2 OS cells. Three independent biological replicates are shown. **(E)** Cumulative frequency distribution plot indicating the fraction of cells categorized based on binned p-Rb mean intensity in 6-hour 100 µM arsenite-treated wildtype, G3BP1/2 dKO, and GFP-G3BP1 + G3BP1/2 dKO U-2 OS cells. The data used to generate images and figures in Figure 2D-E, and Supplemental Figures 1D-E are obtained from the same dataset.

**Supplemental Figure 2: Sorbitol induces cell-cycle exit in G3BP1/2 dKO U-2 OS cells. (A)** Scatterplot of stress granule numbers per cell after cells were untreated or treated for 1-hour with 0.5M sorbitol for wildtype and G3BP1/2 dKO U-2 OS cells. **(B)** Violin plots displaying the mean nuclear intensity of p-Rb in untreated and 0.5M 6-hour sorbitol-treated wildtype, G3BP1/2 dKO, and GFP-G3BP1 + G3BP1/2 dKO U-2 OS cells. Data from three independent biological replicates are presented. **(C)** Cumulative frequency distribution illustrating the fraction of cells categorized based on binned p-Rb mean intensity levels in untreated and 0.5M 6-hour sorbitol-treated wildtype, G3BP1/2 dKO, and GFP-G3BP1 + G3BP1/2 dKO U-2 OS cells. The data utilized for generating images and figures in Figure 3B-C, and Supplemental Figures 2B-C are derived from the same dataset.

**Supplemental Figure 3: GFP-synthetic gene promotes cell-cycle exit in G3BP1/2 dKO U-2 OS cells. (A)** Scatterplot of stress granule numbers per cell after cells were treated for 1-hour with 100 µM arsenite for wildtype, G3BP1/2 dKO and GFP-synthetic + G3BP1/2 dKO U-2 OS cells. **(B)** Violin plots displaying the mean nuclear intensity of p-Rb in untreated wildtype, G3BP1/2 dKO, and GFPsynthetic + G3BP1/2 dKO U-2 OS cells. Data from three independent biological replicates are presented. **(C)** Cumulative frequency distribution representing the fraction of cells categorized based on binned p-Rb mean intensity levels in untreated wildtype, G3BP1/2 dKO, and GFPsynthetic + G3BP1/2 dKO U-2 OS cells. The data used for generating images and figures in Figure 4C-D, and Supplemental Figures 3B-C are derived from the same dataset. **(D)** Violin plots of p-Rb mean nuclear intensity for 6-hour 100µM arsenite-treated wildtype, G3BP1/2 dKO and GFPsynthetic + G3BP1/2 dKO U-2 OS cells. Three independent biological replicates are shown. **(E)** Frequency distribution plot demonstrating the fraction of cells categorized based on binned p-Rb mean intensity levels in 6-hour 100 µM arsenite-treated, G3BP1/2 dKO, and GFPsynthetic + G3BP1/2 dKO U-2 OS cells. The data used to generate images and figures in Figure 4E-F, and Supplemental Figures 3D-E are obtained from the same dataset.

**Supplemental Figure 4: Stress granules promote p21 expression. (A)** Violin plots displaying the mean nuclear intensity of p21 in untreated wildtype, G3BP1/2 dKO, and GFPsynthetic + G3BP1/2 dKO U-2 OS cells. Data from three independent biological replicates are presented. **(B)** Frequency distribution plot representing the fraction of cells categorized based on binned p21 mean intensity levels in untreated wildtype, G3BP1/2 dKO and GFPsynthetic + G3BP1/2 dKO U-2 OS cells. **(C)** Cumulative frequency distribution representing the fraction of cells categorized based on binned p21 mean intensity levels in untreated wildtype, G3BP1/2 dKO, and GFPsynthetic + G3BP1/2 dKO U-2 OS cells. The data used for generating images and figures in Figure 5A-B, and Supplemental Figures 4A-C are derived from the same dataset. **(D)** Violin plots of p21 mean nuclear intensity for 6-hour 100µM arsenite-treated wildtype, G3BP1/2 dKO and GFPsynthetic + G3BP1/2 dKO U-2 OS cells. Three independent biological replicates are shown. **(E)** Frequency distribution plot demonstrating the fraction of cells categorized based on binned p21 mean intensity levels in 6-hour 100 µM arsenite-treated, G3BP1/2 dKO, and GFPsynthetic + G3BP1/2 dKO U-2 OS cells. **(F)** Cumulative frequency distribution plot indicating the fraction of cells categorized based on binned p21 mean intensity in 6-hour 100 µM arsenite-treated wildtype, G3BP1/2 dKO, and GFPsynthetic + G3BP1/2 dKO U-2 OS cells. The data used to generate images and figures in Figure 5C-D, and Supplemental Figures 4D-F are obtained from the same dataset.

**Supplemental Figure 5. G3BP promotes Vinorelbine-induced cell-cycle exit. (A)** Violin plots displaying the mean nuclear intensity of p-Rb in 6-hour 100 µM Vinorelbine-treated wildtype and G3BP1/2 dKO U-2 OS cells. Data from three independent biological replicates are presented. **(B)** Cumulative frequency distribution representing the fraction of cells categorized based on binned p-Rb mean intensity levels in 6-hour 100 µM Vinorelbine-treated wildtype and G3BP1/2 dKO U-2 OS cells. The data used for generating images and figures in Figure 6B-C, and Supplemental Figures 5A-B are derived from the same dataset. **(C)** Violin plots of p21 mean nuclear intensity for 6-hour 100 µM Vinorelbine-treated wildtype and G3BP1/2 dKO U-2 OS cells. Three independent biological replicates are shown. **(D)** Frequency distribution plot demonstrating the fraction of cells categorized based on binned p21 mean intensity levels in 6-hour 100 µM Vinorelbine-treated wildtype and G3BP1/2 dKO U-2 OS cells. **(E)** Cumulative frequency distribution plot indicating the fraction of cells categorized based on binned p21 mean intensity in 6-hour 100 µM Vinorelbine-treated wildtype and G3BP1/2 dKO U-2 OS cells. The data used to generate images and figures in Figure 6D-E, and Supplemental Figures 5C-E are obtained from the same dataset. **(F)** Images of the colony formation of wildtype, G3BP1/2 dKO, and GFP-G3BP1 + G3BP1/2 dKO U-2 OS cells stained with 0.5% crystal violet. Cells treated with 70 µM Vinorelbine for 3 hours, washed, trypsinized, and 100,000 cells were seeded in a new plate. After 12 days of recovery, colony formation was assessed.

**Supplemental Figure 6: Correlation between stress granule protein expression and pancreatic adenocarcinoma clinical outcomes. (A)** Progression-free survival curves comparing high and low-expression of G3BP1 in pancreatic adenocarcinoma tumors from patients, as reported by OncoDB using TCGA datasets. **(B)** Progression-free survival curves comparing high and low expression of p21 in pancreatic adenocarcinoma tumors, as reported by OncoDB using TCGA datasets. **(C)** Pair-wise gene expression correlation analysis between G3BP2 and p21 genes in pancreatic adenocarcinoma tumors, as reported by OncoDB using TCGA datasets. **(D)** Pair-wise gene expression correlation analysis between CAPRIN1 and p21 genes in pancreatic adenocarcinoma tumors, as reported by OncoDB using TCGA datasets. Graphs obtained from <http://OncoDB.org>.
